# Supplementary material for: Development of a Robust Sensor Calibration for a Commercially Available Rising Platemeter to Estimate Herbage Mass on Temperate Seminatural Pastures
Source: MDPI journal article supplement (doi:10.3390/s24072326), 2024-04-05
Supplement: s1 [file s1]

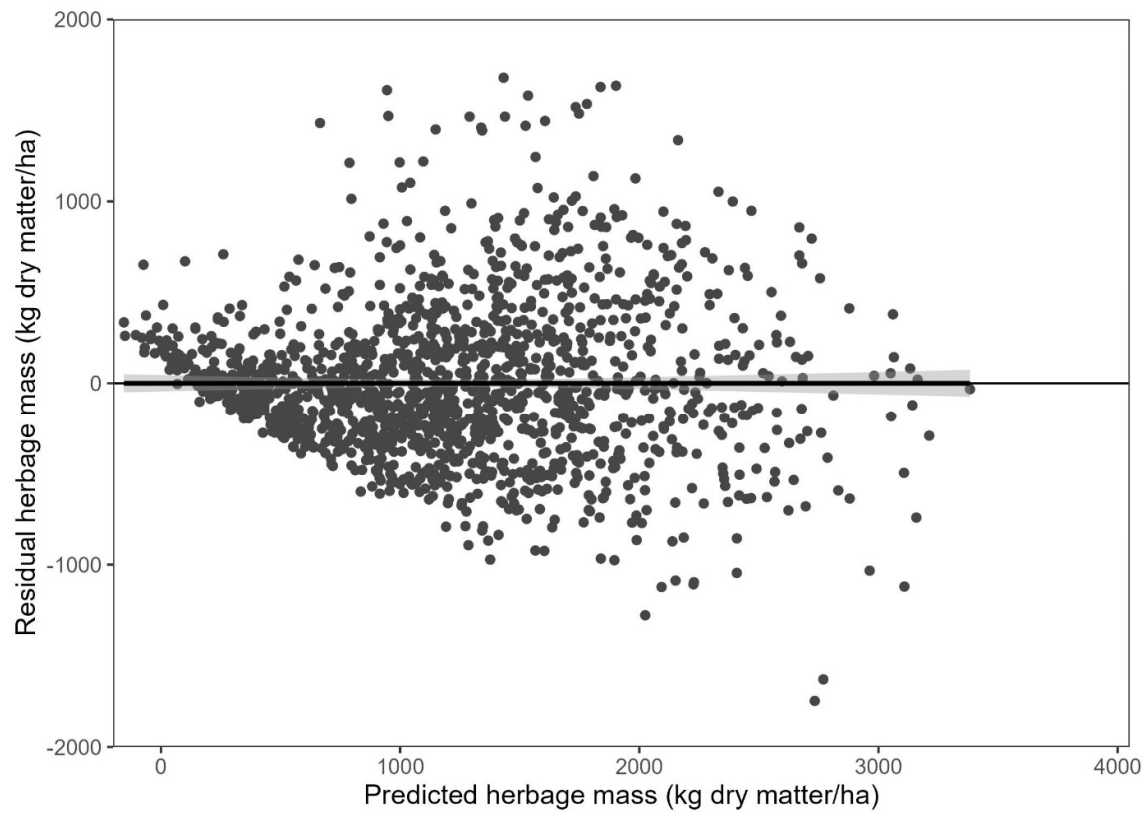

**Figure S1.** Residuals of herbage mass (relationship between observed and predicted herbage mass) vs. predicted herbage mass on temperate seminatural, multispecies pastures when predicted with the new equation.
